# Supplementary material for: Novel S-scheme RP/NiCo-LDH composite with remarkably enhanced photocatalytic activity for H2 evolution under visible-light irradiation
Source: Royal Society of Chemistry journal article supplement (doi:10.1039/d1nj03004c), 2021-01-01
Supplement: d1nj03004c1.pdf [file d1nj03004c1.pdf]

## **Supporting Information**

**Novel S-scheme RP/NiCo-LDH composite with remarkably enhanced photocatalytic activity for H<sub>2</sub> evolution under visible light**

**Linying Hu<sup>1</sup>, Jing Xu<sup>\*1,2,3</sup>, Yin Liu<sup>1</sup>, Sheng Zhao<sup>1</sup>**

**1. School of Chemistry and Chemical Engineering, North Minzu University, Yinchuan 750021, P. R. China**

**2. Ningxia Key Laboratory of Solar Chemical Conversion Technology, North Minzu University, Yinchuan 750021, P. R. China**

**3. Key Laboratory of Chemical Engineering and Technology, State Ethnic Affairs Commission, North Minzu University, Yinchuan 750021, P. R. China**

**Email: [wgyxj2000@163.com](mailto:wgyxj2000@163.com)**

**Table S1.** This experiment is compared with the hydrogen production of the previously reported NiCo-LDH.

| Photocatalyst                                 | Electron donor                                    | H <sub>2</sub> evolution                   | Ref.      |
|-----------------------------------------------|---------------------------------------------------|--------------------------------------------|-----------|
| CoO/NiCo-LDH                                  | Na <sub>2</sub> S/Na <sub>2</sub> SO <sub>3</sub> | 1.50 mmol·g <sup>-1</sup> ·h <sup>-1</sup> | [1]       |
| NiCo-LDH/P-CdS                                | Lactic acid solution                              | 8.67 mmol·g <sup>-1</sup> ·h <sup>-1</sup> | [2]       |
| g-C <sub>3</sub> N <sub>4</sub> @pDA/NiCo-LDH | TEOA                                              | 1.56 mmol·g <sup>-1</sup> ·h <sup>-1</sup> | [3]       |
| CdS/NiCo-LDH                                  | Na <sub>2</sub> S/Na <sub>2</sub> SO <sub>3</sub> | 7.20 mmol·g <sup>-1</sup> ·h <sup>-1</sup> | [4]       |
| NiAl-LDH/g-C <sub>3</sub> N <sub>4</sub>      | TEOA                                              | 1.68 mmol·g <sup>-1</sup> ·h <sup>-1</sup> | [5]       |
| RP/NiCo-LDH                                   | TEOA                                              | 6.28 mmol·g <sup>-1</sup> ·h <sup>-1</sup> | This work |

## 参考文献

- [1] Yijin Wang, Shaohui Guo, Xu Xin, Youzi Zhang, et al. Effective interface contact on the hierarchical 1D/2D CoO/NiCo-LDH heterojunction for boosting photocatalytic hydrogen evolution. *Applied Surface Science*, 2021, 549, 149108.
- [2] Songsong Li, Lu Wang, YanDong Li, Linhe Zhang, et al. Novel photocatalyst incorporating Ni-Co layered double hydroxides with P-doped CdS for enhancing photocatalytic activity towards hydrogen evolution. *Applied Catalysis B: Environmental*, 2019, 254, 145-155.
- [3] Fanying Meng, Yingying Qin, Jian Lu, Xinyu Lin, et al. Biomimetic design and synthesis of visible-light-driven g-C<sub>3</sub>N<sub>4</sub> nanotube @polydopamine/NiCo-layered double hydroxides composite photocatalysts for improved photocatalytic hydrogen evolution activity. *Journal of Colloid and Interface Science*, 2021, 584, 464-473.
- [4] Guoping Jiang, Chaoyue Zheng, Zhiliang Jin. Hexagonal CdS assembled with lamellar NiCo LDH form S-scheme heterojunction for photocatalytic hydrogen evolution. *Materials Science in Semiconductor Processing*, 2021, 135, 106128.
- [5] Jiang-Yan He, Dou Zhang, Xiao-Jing Wang, Jun Zhao, et al. Phosphorylation of NiAl-layered double hydroxide nanosheets as a novel cocatalyst for photocatalytic hydrogen evolution. *International Journal of Hydrogen Energy*, 2021, 46(36), 18977-18987.
